# Supplementary material for: Tunable, colorimetric DNA-based pH sensors mediated by A-motif formation
Source: Royal Society of Chemistry journal article supplement (doi:10.1039/c2cc16347k), 2012-01-01
Supplement: c2cc16347k.pdf [file c2cc16347k.pdf]

## Supporting Information

### Tunable, colorimetric DNA-based pH sensors mediated by A-motif formation

Sonali Saha,<sup>†</sup> Kasturi Chakraborty,<sup>†</sup> and Yamuna Krishnan\*<sup>†</sup>

<sup>†</sup> National Centre for Biological Sciences, Tata Institute of Fundamental Research, GKVK, Bellary Road, Bangalore 560 065, India

#### 1. Materials

HPLC purified 5' thiol modified oligonucleotides were purchased from IBA GmbH, Germany. Hydrogen tetrachloroaurate(III) (HAuCl<sub>4</sub>.3H<sub>2</sub>O) and tri-Sodium citrate dihydrate (Na<sub>3</sub>C<sub>6</sub>H<sub>5</sub>O<sub>7</sub>·2H<sub>2</sub>O), 99%, were purchased from S. D. Fine Chemicals Limited, India. Dithiothreitol (DTT), Sephadex G-25 (DNA grade) and all other reagents were purchased from Sigma-Aldrich, USA. 96 well tissue culture plates for colorimetric assays were purchased from Tarsons, India. Milli-Q water was used for all experiments.

#### 2. Instrumentations

Gold nanoparticle (GNP) solutions and oligonucleotides were quantified using Cary 300 bio UV-Visible Spectrophotometer, Agilent Technologies in 1 cm quartz cuvette. UV-vis absorption spectra for colorimetric assay were recorded from 400 nm to 800 nm using SpectraMax M5 Multimode Microplate reader, Molecular Devices.

#### 3. Preparation of GNPs

13 nm GNPs were synthesized by the citrate reduction method described previously.<sup>1</sup> Briefly, 20 mL of 1 mM HAuCl<sub>4</sub> aqueous solution was heated to 60° C with constant stirring. 2 mL of 38.8 mM sodium citrate was added rapidly at a time, and then the solution was refluxed for an additional 30 min while stirring vigorously. The color changed from pale yellow to deep red, and the solution was allowed to cool to room temperature before use. Size of the GNPs (13.2 ± 1.55 nm) was determined from TEM images confirms the synthesis of monodisperse GNPs (data not shown). The concentrations of 13 nm GNPs were determined using UV-vis spectroscopy (extinction coefficient:  $2.7 \times 10^8 \text{ M}^{-1} \text{ cm}^{-1}$  at  $\lambda_{520}$  for 13 nm GNPs).<sup>2</sup>

#### 4. Preparation of oligonucleotide modified GNPs

GNPs were functionalized with oligonucleotides using modified literature methods.<sup>3</sup> Briefly, the disulfide bonds between the oligonucleotides were reduced prior to GNP functionalization by DTT treatment. DTT treatment was done using 100 fold molar excess DTT over oligonucleotides (total 25  $\mu\text{M}$ ), in presence of 5 mM TE buffer of pH 8 (10 mM Tris-Cl, pH 8 and 1 mM EDTA) for 1 h at room temperature. The reduced oligonucleotides were purified using a spin column packed with Sephadex G-25 column and then immediately added to an aqueous solution of GNPs (3 nmol of oligonucleotide/mL GNPs). 10 fold molar excess of spacer oligonucleotides compared to A-rich oligonucleotides have been used for GNP modification. The oligonucleotide added GNP solution was allowed to incubate with constant shaking overnight at room temperature. To remove excess oligonucleotides, the GNPs were centrifuged at 13,000 rpm for 30 min at 4° C. The supernatant was removed, leaving a pellet of gold nanoparticles at the bottom of an Eppendorf tube. The particles then were resuspended in Milli Q water and stored at 4° C.

#### 5. Spacer oligonucleotides

Incorporation of 10 fold molar excess of spacer oligonucleotides prevents the formation of “intraparticle” A-motifs (i.e., A-motifs formed from proximal A-rich oligonucleotides on the surface of the same GNP, Fig. S4 (I)) as well as minimize surface crowding during the formation of “interparticle” A-motifs. The electrostatic repulsion between the  $A_{30}$  backbone and the negatively charged  $S_6$  shell on the GNP would inhibit intraparticle A-motif formation. According to the design shown in Scheme 1 in main text, the spacer length on GNPs determines the effective thickness of the negatively charged shell on the GNP surface.

#### 6. Colorimetric assay

3 nM  $A_n-S_m$  functionalized GNPs were incubated in 10 mM buffers of different pH ranging from pH 2 to 7. The solutions were incubated for 15 min at room temperature before data acquisition. Analysis of these solutions by UV-Vis spectroscopy revealed that at higher pH, absorbance at 520 nm characteristic of isolated GNPs was observed, while at acidic pH the 520 nm peak shifted to higher wavelengths and a new, broad absorption (540–750 nm) appeared for aggregated GNPs. In brief, the bathochromic shift of GNP absorbance correlated perfectly with decreasing pH value of the solutions in Fig. 1A (main text). Upon GNP aggregation, their absorbance at 700 nm ( $A_{700}$ ) intensified and the Plasmon absorbance at 520 nm ( $A_{520}$ )

corresponding to individual GNPs decreased. Thus the extent of color change corresponding to extent of aggregation is revealed from the absorbance ratio ( $A_{520}/A_{700}$ ) that is a quantitative representation of the color of the system.<sup>4</sup> In these experiments, the solutions were agitated each time before recording optical spectra to ensure homogeneity of the particle suspension.

## 7. Mutational analysis

From the positional mutation analysis data (Fig. 2A, main text), we observe that the A residues at the exposed 3' end is most important in mediating interparticle A-motif formation. Notably, this is in contrast to duplex DNA where hybridization happens in a head to tail orientation and mutations at the centre of the duplex cause the greatest destabilization.<sup>5</sup> This can be reconciled from the difference between the mechanisms of B-DNA and A-motif duplexation. The former needs a 'seed' complementary region that functions as a nucleating region and finally zips up to form the double helix,<sup>6</sup> whereas A-motif formation is diffusion controlled, with every collision being a productive one, leading to a 'creeping' mechanism that results in complete base pairing.<sup>7</sup>

## 8. Mutational analysis supports the 'fold-back' mode of association

In order to probe interparticle GNP association in case of  $A_{30}$ - $S_6$  GNP, we chose GNPs modified with A-rich oligonucleotides of constant length (30 mer), but incorporating A→T mutations at specific positions that could result in a mismatch at a pre-designated locations (shown in Table 1) in the expected fold-back A-motif or head-to-head A-motif. We chose the residues on  $dA_{30}$  for mutation corresponding to four distinct regions on the expected 'fold-back' A-motif model (Fig. S1A). These were (i) **B1**: residues involved in intramolecular  $AH^+-H^+A$  base pairing (shown in magenta), (iii) **T<sub>d</sub>**: residues present at the turn, distal from the GNP surface and potentially available for interparticle  $AH^+-H^+A$  base pairing (shown in orange), (iv) **T<sub>p</sub>**: residues present at the turn, proximal to the GNP surface and therefore unavailable for  $AH^+-H^+A$  base pairing *only in the case of fold-back structure* (shown in dark blue) and (v) **L1**: residues in the loop (shown in red) (Fig. S1A) also unavailable for  $AH^+-H^+A$  base pairing *only in the case of fold-back structure*. Residues on  $dA_{30}$  buried in the spacer shell surrounding the GNP were not considered for mutation (cyan region).

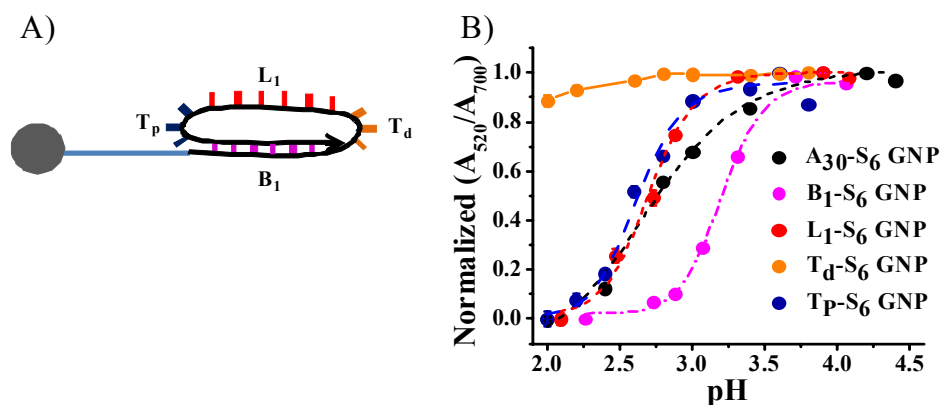

**Figure S1** (A) Working model for proposed 'fold-back' A-motif. 5' residues buried in the spacer oligos are shown in light blue. Four distinct regions on the expected 'fold-back' A-motif model have been indicated as B<sub>1</sub>: magenta; T<sub>d</sub>: orange; L<sub>1</sub>: red and T<sub>p</sub>: dark blue. Mutated residues have been shown as bold lines. (B) Comparison of the normalized curves of the colorimetrically quantified pH dependent interparticle association of the GNPs modified with dA<sub>30</sub> carrying A→T mutations at the positions shown in (A).

In case of interparticle GNP association via 'head-to-head' hybridization, all the mutated dA<sub>30</sub> sequences are expected to show shift in pH<sub>1/2</sub> towards lower pH values due to destabilization of the resultant interparticle A-motifs. Fig. S1B shows the corresponding sigmoidal transition curves. Mutations at various positions on dA<sub>30</sub> show different effects on interparticle association which indicates differential accessibility of these residues for interparticle AH<sup>+</sup>-H<sup>+</sup>A base pairing. As expected, the pH response of L<sub>1</sub>-S<sub>6</sub> GNPs remain constant compared to A<sub>30</sub>-S<sub>6</sub> GNPs, characteristic of either (i) mutations in the centre of A-rich tracts having no effect in a head-to-head mode of association or (ii) no effect of these residues in the stability of a fold-back A-motif model (as seen in Fig. S1A) due to their non-interacting nature in the fold-back loop. In the head-to-head model of interparticle association, A→T mutations on B<sub>1</sub>-S<sub>6</sub> GNPs should show a *decrease* in pH<sub>1/2</sub> values. However, these showed a pH<sub>1/2</sub> that was substantially shifted towards higher pH values. This may be explained by the greater destabilization caused to the AH<sup>+</sup>-H<sup>+</sup>A base pairs in the fold-back A-motif. This decrease in fold-back A-motif stability, would lead to a greater proportion of interparticle association mediated by a greater proportion of A-rich strands associating via the head-to-head mode which is expected to have higher pH<sub>1/2</sub> values (Fig. 3B revised manuscript). Consistent with this, T<sub>d</sub>-S<sub>6</sub> GNPs shows a dramatic decrease in pH<sub>1/2</sub> compared to the native A<sub>30</sub>-S<sub>6</sub> GNP, indicating crucial involvement of these residues in mediating interparticle GNP association. Importantly in a linear,

head-to-head A-motif model, mutations in this region should show *negligible* change in  $\text{pH}_{1/2}$  (similar to L1-S6 GNPs). This strongly supports that the A-tract has folded back, leaving these residues at the distal terminus, that can promote interparticle GNP association by further  $\text{AH}^+ \cdot \text{H}^+ \text{A}$  base pairing. In perfect accordance,  $\text{T}_p\text{-S}_6$  GNP particles showed negligible change in their pH response compared to  $\text{A}_{30}\text{-S}_6$  GNP. Taken together, these mutational data support a model of ‘fold-back’ A-motif mediated association as shown in Fig. 3C. Importantly, the data in Fig. 3A & 3B (main text) do not fit a model of a simple unimodal association, i.e., head-to-head hybridization alone by long poly dA tracts, although this is true for short poly dA tracts.

#### 9. Table showing buffers of different pH ranges:

| pH range  | Buffers   |
|-----------|-----------|
| 2.0 – 4.2 | Citrate   |
| 4.2 – 5.5 | Acetate   |
| 5.5 – 7.0 | Phosphate |

#### References:

- (1) J. J. Storhoff, R. Elghanian, R. C. Mucic, C. A. Mirkin and R. L. Letsinger, *J. Am. Chem. Soc.*, 1998, **120**, 1959.
- (2) F. Huo, A. K. R. Lytton-Jean and C. A. Mirkin, *Adv. Mater.*, 2006, **18**, 2304.
- (3) S. J. Hurst, A. K. R. Lytton-Jean and C. A. Mirkin, *Anal. Chem.*, 2006, **78**, 8313.
- (4) J. Liu and Y. Lu, *J. Am. Chem. Soc.*, 2003, **125**, 6642.
- (5) Z. Guo, Q. Liu and L. M. Smith, *Nat. Biotechnol.*, 1997, **15**, 331.
- (6) C. Sönnichsen, B. M. Reinhard, J. Liphardt and A. P. Alivisatos, *Nat. Biotechnol.*, 2005, **23**, 741.
- (7) R. Maggini, F. Secco, M. Venturini and H. Diebler, *Faraday Trans.*, 1994, **90**, 2359.
- (8) S. Chakraborty, S. Sharma, P. K. Maiti and Y. Krishnan, *Nucleic Acids Res.*, 2009, **37**, 2810.

| Name of the oligonucleotide | Sequences (5' to 3')<br>All the sequences contain 5' thiol modification |
|-----------------------------|-------------------------------------------------------------------------|
| A <sub>8</sub>              | AAAAAAAA                                                                |
| A <sub>15</sub>             | AAAAAAAAAAAAAAAAA                                                       |
| A <sub>22</sub>             | AAAAAAAAAAAAAAAAAAAAA                                                   |
| A <sub>30</sub>             | AAAAAAAAAAAAAAAAAAAAAAAAA                                               |
| T <sub>15</sub>             | TTTTTTTTTTTTTTTT                                                        |
| S <sub>6</sub>              | ATTATA                                                                  |
| S <sub>9</sub>              | CGATATATT                                                               |
| S <sub>12</sub>             | CGATATCTTCGT                                                            |
| S <sub>15</sub>             | CGATATCTTCGTTAT                                                         |
| S <sub>18</sub>             | GAACCACGATATCTTCGT                                                      |
| S <sub>21</sub>             | GAACCACGATATCTTCGTTAT                                                   |
| S <sub>24</sub>             | CTCGAACCACGATATCTTCGTTAT                                                |
| S <sub>28</sub>             | GCGACTGATGGCGAGTGCAAAGCGTGGC                                            |
| M <sub>1</sub>              | AAAAAAAAAAAA <b>T</b> AAA                                               |
| M <sub>5'</sub>             | AAAAA <b>T</b> AAAAAAAAA                                                |
| M <sub>3'</sub>             | AAAAAAAAAAAA <b>A</b> T                                                 |
| M <sub>2</sub>              | AAAAAAA <b>TAA</b> TAAA                                                 |
| M <sub>3</sub>              | AAAAAAA <b>TAA</b> TAA <b>T</b>                                         |
| B <sub>1</sub>              | AAAAAAA <b>TAT</b> AAAAAAAAAAAAAAAAA                                    |
| L <sub>1</sub>              | AAAAAAA <b>TAA</b> TAAAAAAAAA                                           |
| T <sub>d</sub>              | AAAAAAA <b>TT</b> AAAAA                                                 |
| T <sub>p</sub>              | AAAAAAA <b>TT</b> AAAAAAAAAAAAA                                         |

**Table S1** The sequences of the 5' thiol modified oligonucleotides for GNP modification. Bases shown in bold and italics represent mutated sites that would result in mismatches in the corresponding A-motif.

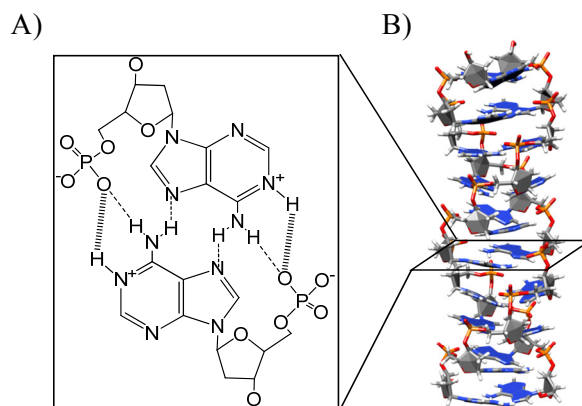

**Figure S2** (A) Shows the  $AH^+-H^+A$  base pairing scheme in A-motif. (B) N1-protonated adenosine mediated parallel duplex of A-motif (Adapted from ref 8).

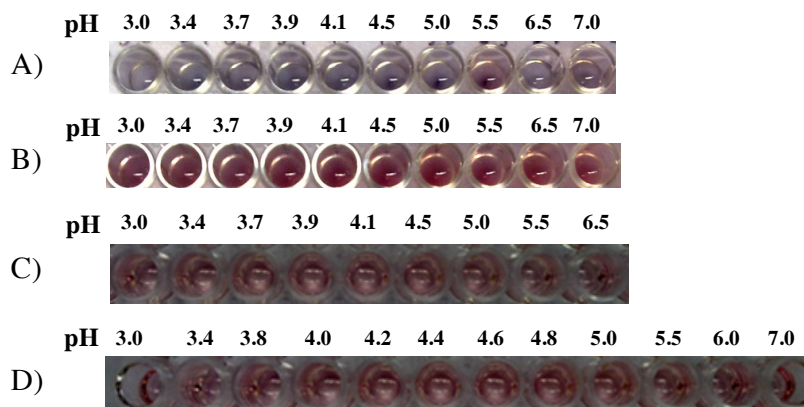

**Figure S3** Control experiments showing negligible color changes of solutions containing unmodified GNPs (A);  $S_6$  modified GNPs (B);  $T_{15}$ - $S_6$  modified GNPs (C) and  $A_{15}$ - $S_{28}$  modified GNPs (D) as a function of pH. These color changes are quantified and presented in **Figure 1B** of the main text.

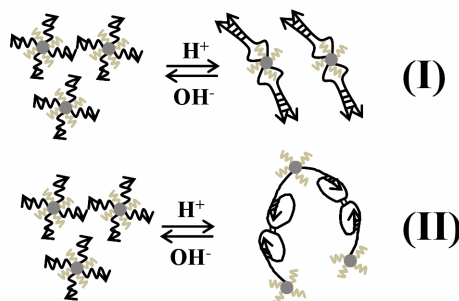

**Figure S4** Schematic illustrating the proposed mechanisms to explain the discrepancy of transition pH ( $pH_{1/2}$ ) shown by  $A_{30}$ - $S_6$ .

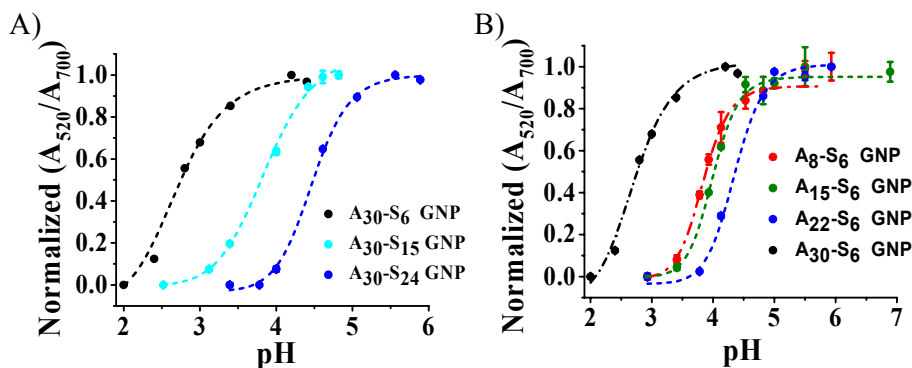

**Figure S5** Comparison of the normalized curves of the colorimetrically quantified pH dependent interparticle association of the GNPs (A) modified with  $dA_n$  (where  $n = 8, 15, 22$  and  $30$ ) and  $dS_6$ . (B) modified with  $dA_{30}$  and  $dS_m$  (where  $m = 6, 15,$  and  $24$ ). Interparticle associations are quantified by the ratios of UV-vis absorption ( $A_{520}/A_{700}$ ) as a function of pH.

|         | 1.0 | 1.2 | 1.4 | 1.6 | 1.8 | 2.0 | 2.2 | 2.4 | 2.6 | 2.8 | 3.0 | 3.2 | 3.4 | 3.6 | 3.8 | 4.0 | 4.2 | 4.4 | 4.6 | 4.8 | 5.0 | 5.2 | 5.4 | 5.6 | 5.8 | 6.0 |  |
|---------|-----|-----|-----|-----|-----|-----|-----|-----|-----|-----|-----|-----|-----|-----|-----|-----|-----|-----|-----|-----|-----|-----|-----|-----|-----|-----|--|
| A8-S6   |     |     |     |     |     |     |     |     |     |     |     |     |     |     |     |     |     |     |     |     |     |     |     |     |     |     |  |
| A15-S6  |     |     |     |     |     |     |     |     |     |     |     |     |     |     |     |     |     |     |     |     |     |     |     |     |     |     |  |
| A22-S6  |     |     |     |     |     |     |     |     |     |     |     |     |     |     |     |     |     |     |     |     |     |     |     |     |     |     |  |
| A30-S6  |     |     |     |     |     |     |     |     |     |     |     |     |     |     |     |     |     |     |     |     |     |     |     |     |     |     |  |
| M5-S6   |     |     |     |     |     |     |     |     |     |     |     |     |     |     |     |     |     |     |     |     |     |     |     |     |     |     |  |
| M1-S6   |     |     |     |     |     |     |     |     |     |     |     |     |     |     |     |     |     |     |     |     |     |     |     |     |     |     |  |
| M3-S6   |     |     |     |     |     |     |     |     |     |     |     |     |     |     |     |     |     |     |     |     |     |     |     |     |     |     |  |
| M2-S6   |     |     |     |     |     |     |     |     |     |     |     |     |     |     |     |     |     |     |     |     |     |     |     |     |     |     |  |
| M3-S6   |     |     |     |     |     |     |     |     |     |     |     |     |     |     |     |     |     |     |     |     |     |     |     |     |     |     |  |
| A30-S15 |     |     |     |     |     |     |     |     |     |     |     |     |     |     |     |     |     |     |     |     |     |     |     |     |     |     |  |
| A30-S24 |     |     |     |     |     |     |     |     |     |     |     |     |     |     |     |     |     |     |     |     |     |     |     |     |     |     |  |

**Table S2** Shows tunable pH sensitive range of differentially modified GNPs as colorimetric sensor. Top most row indicates pH and left most column indicates the GNP modifications.
